# Supplementary material
Source: publisher site journal article supplement (https://www.dovepress.com/article/494622)
Supplement: Supplementary file 1 [file get_supplementary_file.php]

**Supplementary Table 1.** ROC curves for systematic inflammatory response index

| **Items** | **PLR** | **NLR** | **LMR** |
| --- | --- | --- | --- |
| **1-year follow-up**  AUC  95% CI  *P* value | 0.574  0.487-0.661  0.086 | 0.562  0.480-0.644  0.150 | 0.488  0.399-0.578  0.782 |
| **3-year follow-up**  AUC  95% CI  *P* value | 0.588  0.522-0.654  0.008 | 0.556  0.489-0.623  0.093 | 0.465  0.397-0.533  0.291 |
| **5-year follow-up**  AUC  95% CI  *P* value | 0.580  0.517-0.643  0.012 | 0.547  0.482-0.611  0.146 | 0.467  0.402-0.533  0.309 |

**Abbreviations:** PLR, platelet-to-lymphocyte ratio; NLR, neutrophil-to-lymphocyte ratio; LMR, lymphocyte-to-monocyte ratio; AUC, area under curve; 95% CI, 95% confidence interval.


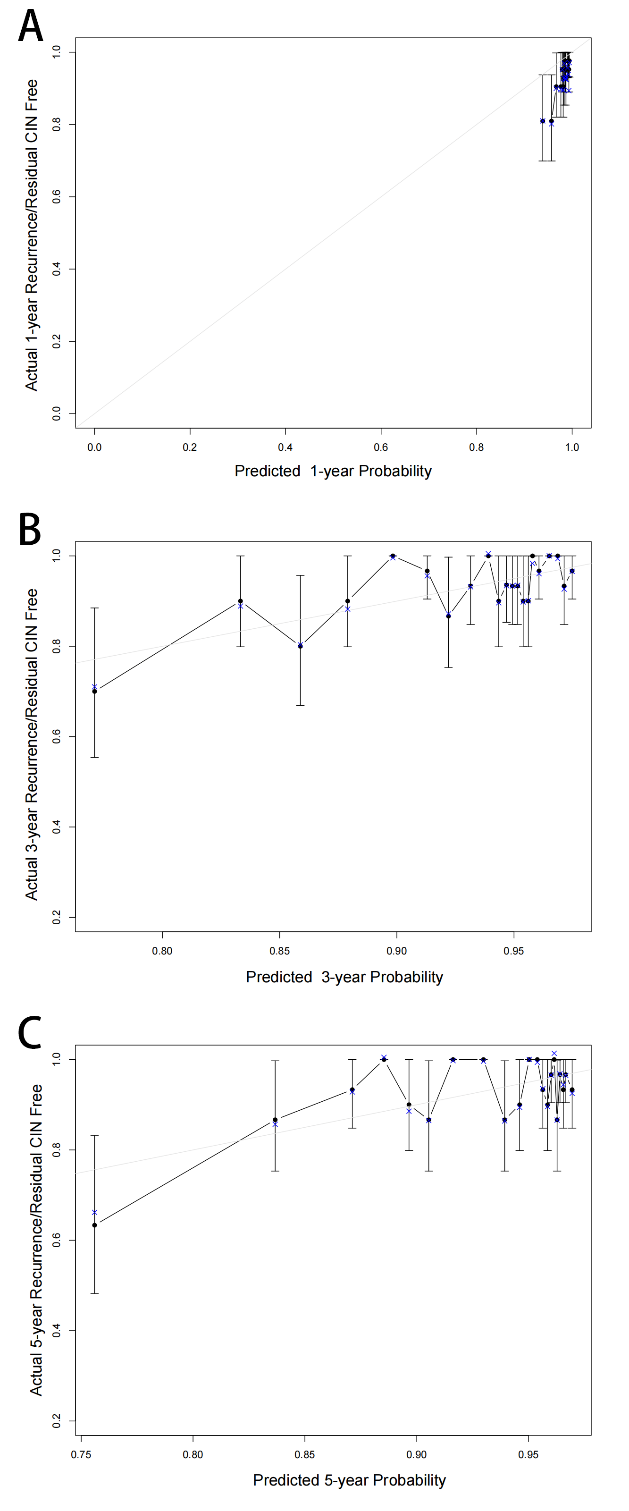


**Supplementary Figure 1.** The calibration plot for Cox regression models. **A.** The calibration plot for Cox regression models at the 1-year follow-up; **B.** The calibration plot for Cox regression models at the 1-year follow-up; **C.** The calibration plot for Cox regression models at the 1-year follow-up.
